# Supplementary material for: Structural evolution of a metal–organic framework and derived hybrids composed of metallic cobalt and copper encapsulated in nitrogen-doped porous carbon cubes with high catalytic performance
Source: Royal Society of Chemistry journal article supplement (doi:10.1039/c6ce01995a), 2016-11-21
Supplement: c6ce01995a1.pdf [file c6ce01995a1.pdf]

**Structural evolution of metal–organic framework and derived hybrids composed of metallic cobalt and copper encapsulated in nitrogen-doped porous carbon cubes with high catalytic performance**

Hui Li,<sup>a</sup> Fan Yue,<sup>a</sup> Chao Yang,<sup>a</sup> Peng Xue,<sup>a</sup> Nannan Li,<sup>a</sup> Yi Zhang<sup>b</sup> and Jide Wang<sup>\*a</sup>

<sup>a</sup> *Key Laboratory of Oil and Gas Fine Chemicals, Ministry of Education & Xinjiang Uygur Autonomous Region, College of Chemistry and Chemical Engineering of Xinjiang University, Urumqi, 830046, China*

<sup>b</sup> *Key Laboratory of Resources Chemistry of Nonferrous Metals (Ministry of Education), College of Chemistry and Chemical Engineering, Central South University, Changsha, 410083, China*

Corresponding author: Jide Wang

E-mail address: [awangjd@sina.cn](mailto:awangjd@sina.cn)

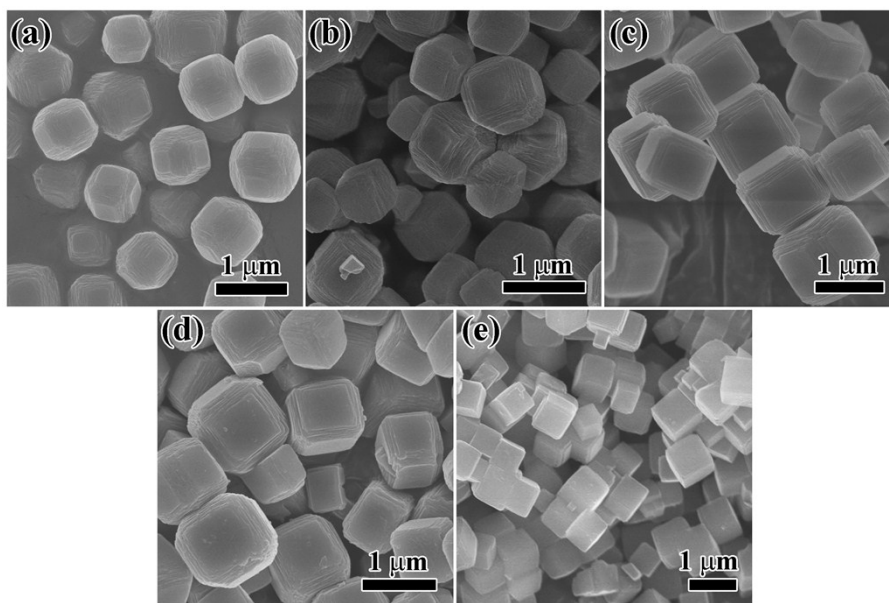

**Fig. S1** Low magnification SEM images of Cu-Co PBA as a function of synthesis time: (a) 10 min; (b) 1 h; (c) 6 h; (d) 12 h and (e) 24 h.

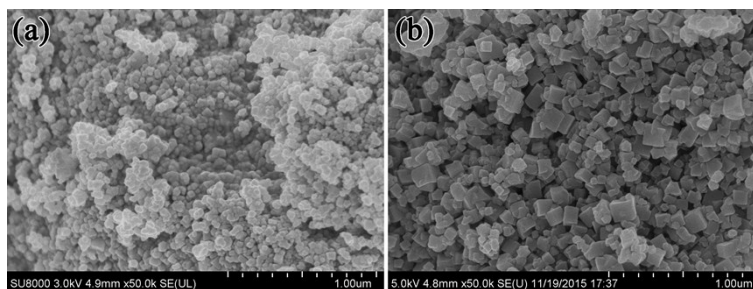

**Fig. S2** SEM images of the products after precipitation process with different amounts of sodium citrate: (a) 0 mmol and (b) 4.5 mmol

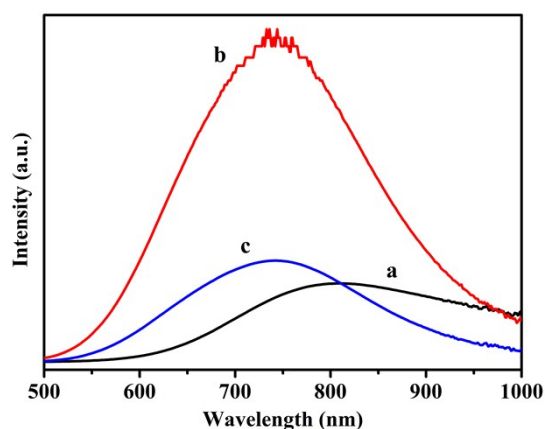

**Fig. S3** UV-vis absorption of (a) copper nitrate solution; (b) the mixed solution of copper nitrate and potassium hexacyanocobaltate(III); (c) the filtrate after copper nitrate, sodium citrate and potassium hexacyanocobaltate(III) was mixed for 1 h. The concentrations of all solutions are identical to the part of synthesize Cu-Co PBA

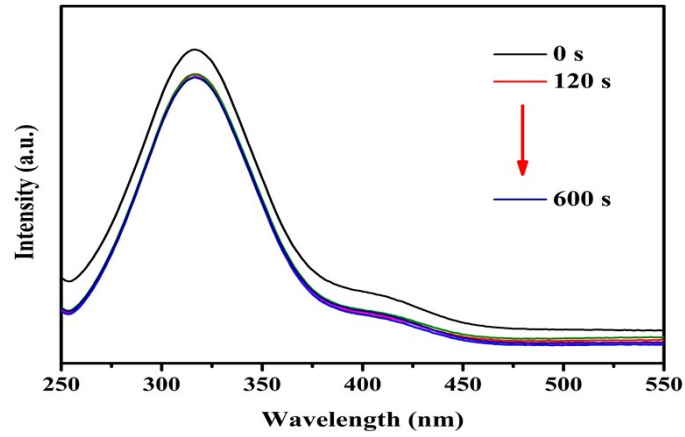

**Fig. S4** Changes of time-dependent UV-vis absorption spectra of 4-NP adsorbed by Cu/Co-NPCC-600

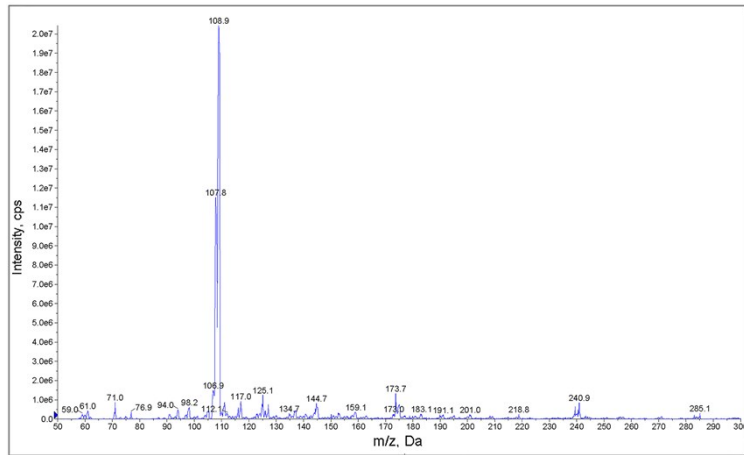

**Fig. S5** LC-MS of the 4-NP reduced product catalyzed by the Cu/Co-NPCC-600

**Table S1** EDS characterization results of different catalyst

|                | C (%) | N (%) | O (%) | K (%) | Cu (%) | Co (%) | Total (%) |
|----------------|-------|-------|-------|-------|--------|--------|-----------|
| Cu/Co@NPCC-600 | 37.54 | 3.83  | 5.17  | 1.09  | 24.98  | 27.39  | 100       |
| Cu/Co@NPCC-700 | 39.68 | 0.80  | 4.63  | 0.94  | 24.88  | 29.07  | 100       |
| Cu/Co@NPCC-800 | 21.37 | —     | 3.27  | —     | 37.12  | 38.24  | 100       |
| Cu/Co-NPCC-600 | 78.59 | 5.63  | 5.73  | 0.50  | 1.14   | 8.11   | 100       |
| Cu/Co-NPCC-700 | 79.33 | 0.63  | 8.03  | 0.48  | 1.51   | 10.02  | 100       |

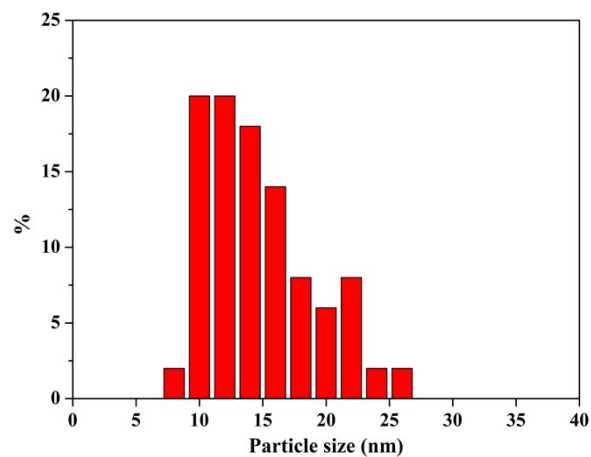

**Fig. S6** Particle size distribution diagram of the metal particles in the Cu/Co@NPCC-600

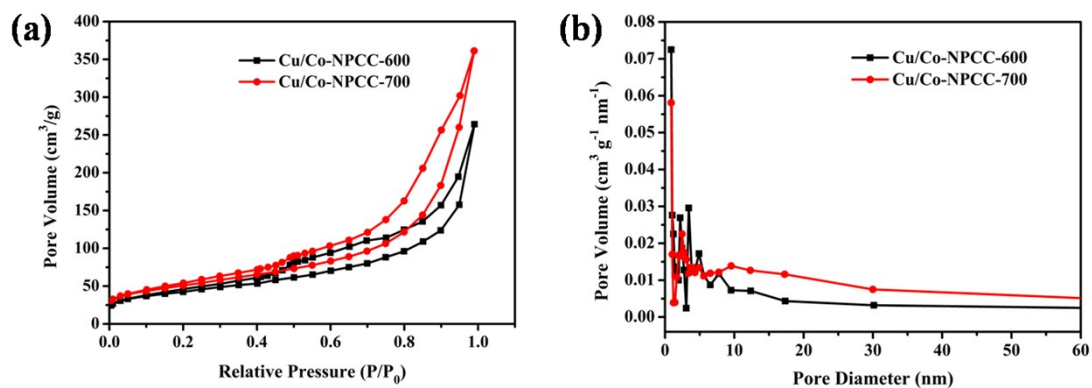

**Fig. S7** N<sub>2</sub> adsorption-desorption isotherm (a) and the corresponding pore-size distribution (b) of Cu/Co-NPCC-600 and Cu/Co-NPCC-700.
